# Supplementary material for: Synthesis of ThO2nanostructures through a hydrothermal approach: influence of hexamethylenetetramine (HMTA) and sodium dodecyl sulfate (SDS)
Source: Royal Society of Chemistry journal article supplement (doi:10.1039/c4ra07466a), 2014-10-10

## Supporting Information

### Synthesis of ThO<sub>2</sub> nanostructures through a hydrothermal approach: influences of hexamethylenetetramine (HMTA) and sodium dodecyl sulfate (SDS)

Ran Zhao,<sup>a</sup> Lin Wang,<sup>a</sup> Zhi-Fang Chai,<sup>ab</sup> and Wei-Qun Shi\*<sup>a</sup>

*a* Group of Nuclear Energy Chemistry, Key Laboratory of Nuclear Radiation and Nuclear Energy Technology and Key Laboratory for Biomedical Effects of Nanomaterials and Nanosafety, Institute of High Energy Physics, Chinese Academy of Sciences, Beijing 100049, China. E-mail: [shiwq@ihep.ac.cn](mailto:shiwq@ihep.ac.cn)

*b* School of Radiological & Interdisciplinary Science (RAD-X) and Collaborative Innovation Center of Radiation Medicine of Jiangsu Higher Education Institutions, Soochow University, Suzhou 215123, China

Figure S1. The size histograms of the sample 1.

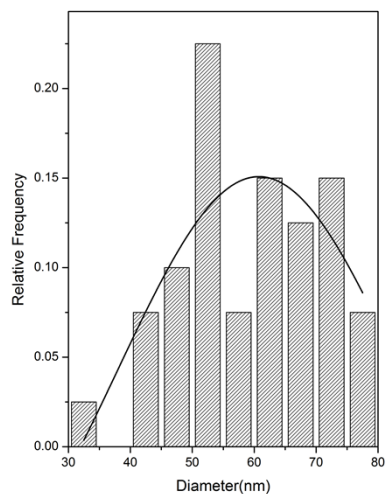

Figure S2. The size histograms of the sample 2(a), 3(b) and 4(c).

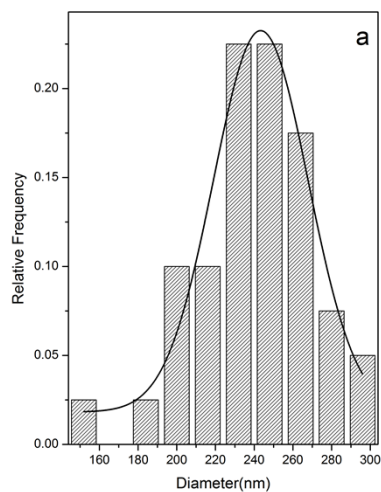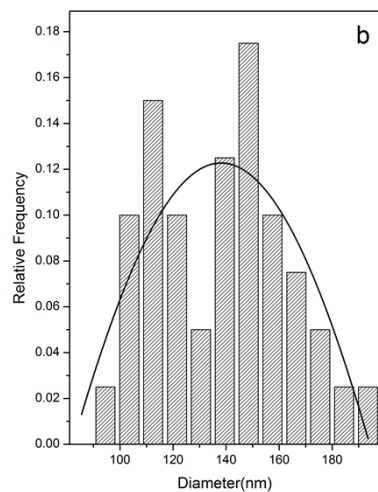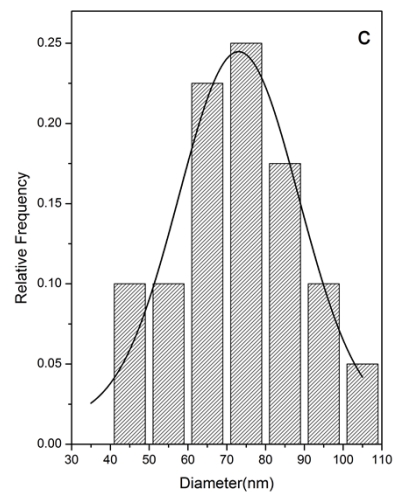

Figure S3. The size histograms of the sample 5(a), 6(b) and 7(c).

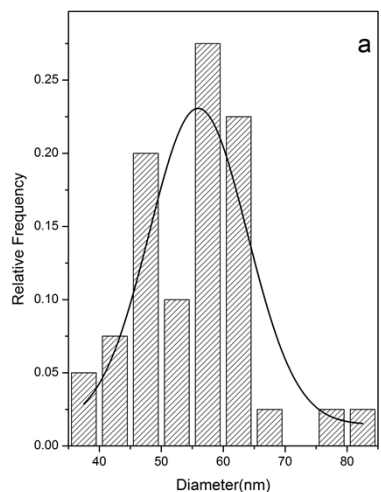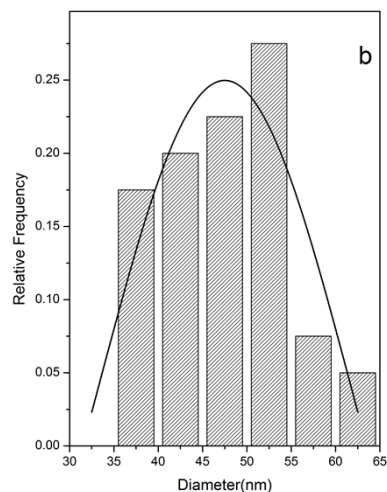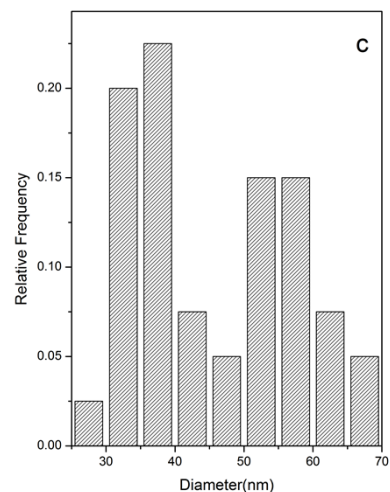

Figure S4. The SEM images of the sample 13(a), 14(b), 15(c) and 16(d).

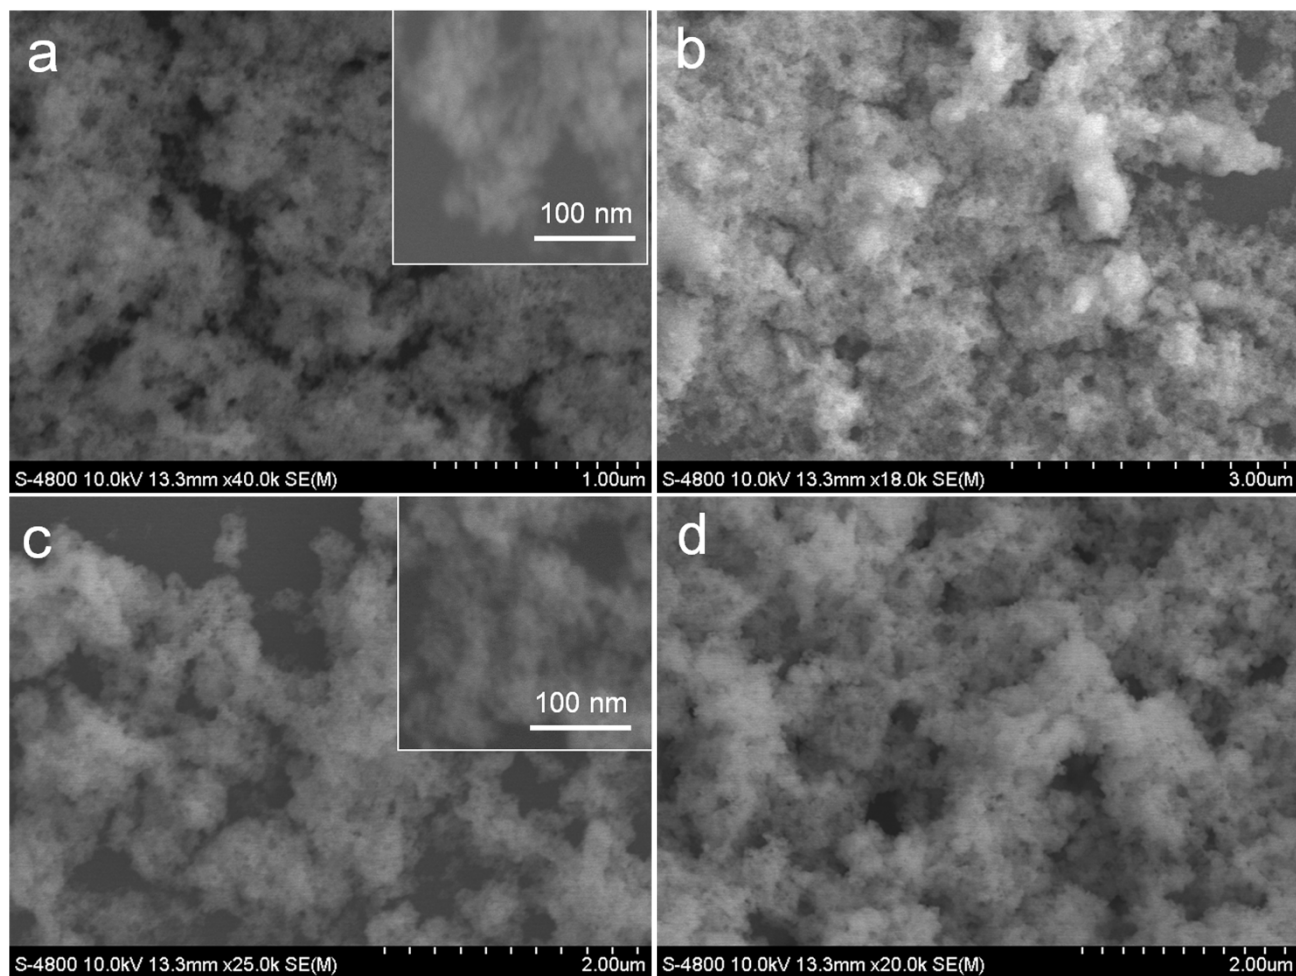

Figure S5. FT-IR spectrum of the sample 2(a), 13(b) and 15(c).

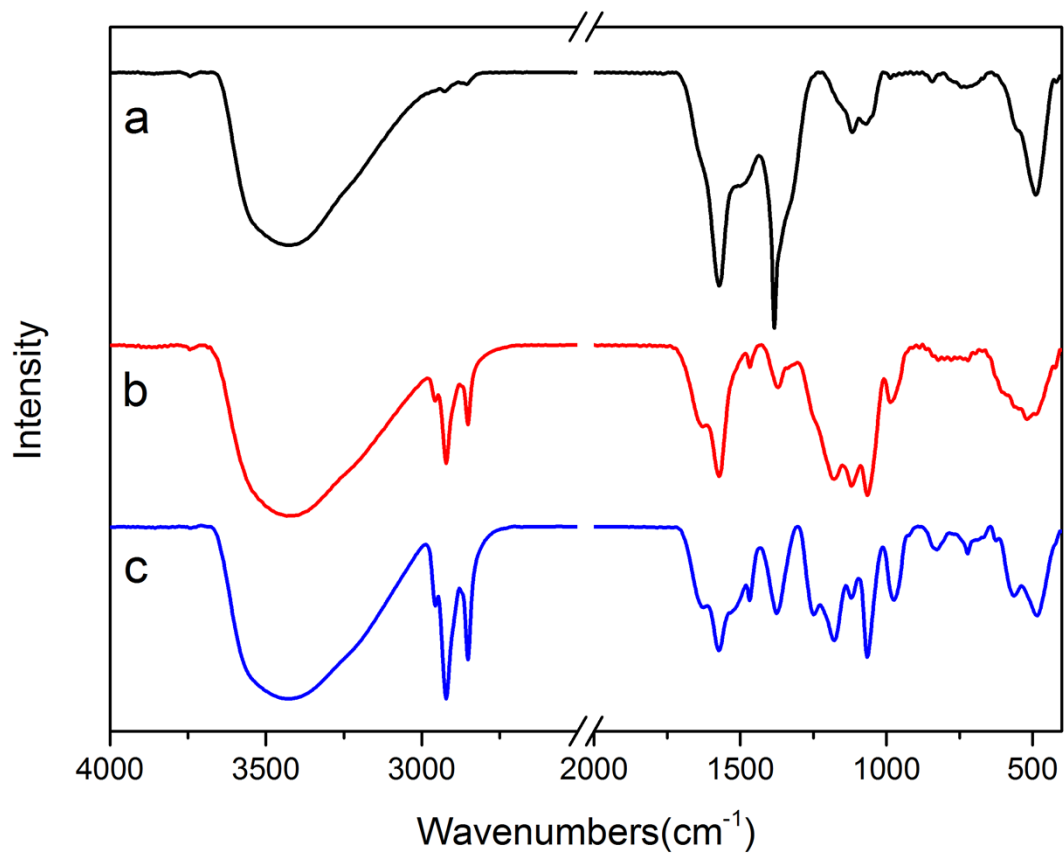

Figure S6. The size histograms of the sample 17(a) and 18(b)

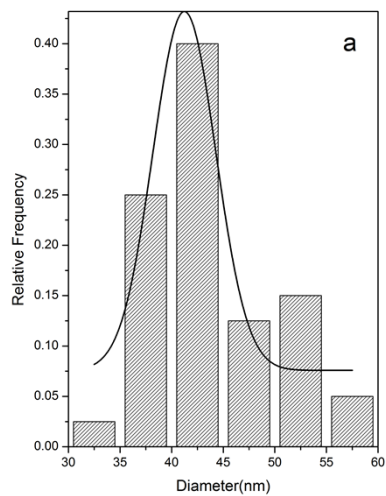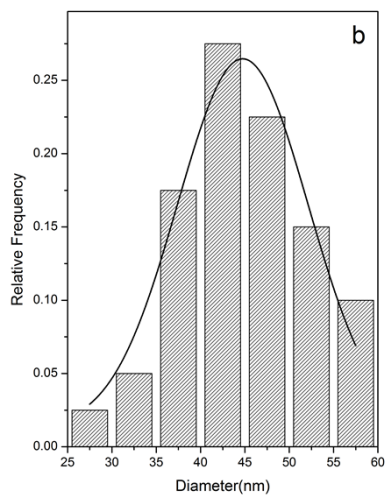

Supplement: c4ra07466a1.pdf [file c4ra07466a1.pdf]
